# Supplementary material for: Comparative Genomics of Emerging Lineages and Mobile Resistomes of Contemporary Broiler Strains of Salmonella Infantis and E. coli
Source: Front Microbiol. 2021 Feb 25;12:642125. doi: 10.3389/fmicb.2021.642125 (PMC7947892; doi:10.3389/fmicb.2021.642125)
Supplement: Supplementary Table 2 — Sero- and phylogroups of E. coli strains isolated from different broiler sources. [file Table_2.xlsx]

## Sheet: Table S2
	O-type	H-type	Phylogroup	ST	Strain no.			SAMPLE SOURCE
1	O3	H10	E	118	2				CAECUM
2	O4	H4	A	10	2				BONE MARROW
3	O5	H10	A	93	1				FAECES
		H21	B1	162	1
		H40	A	93	1
			A	93	1	4
4	O6	H16	A	373	1
5	O7	H31	B1	58	1
6	O8	H7	B1	1642	1
		H9	A	nt	1
			C	90	1
			C	23	2
		H19	C	88	1
		H25	B1	58	2	8
7	O9	H4	A	46	1
		H9	B1	162	1
			B1	2179	1
		H19	B1	155	1
			B1	162	1
		H21	B1	155	2	7
8	O10	H9	D	115	1
9	O11	H4	F	117	1
		H43	B1	7705	1
10	O15	H6	D	2309	1
		H10	A	93	1
11	O16	H48	A	10	1
12	O17/O44/O77	nt	F	1158	1
13	O18	H7	B1	351	1
		H49	B1	212	1
14	O21	H45	B1	616	1
15	O23	H16	B1	453	2
			B1	453	1
16	O26	H34	A	752	1
17	O29	H10	B1	1720	1
18	O50/O2	H1	B2	429	1
		H5	B2	95	1
			B2	355	1
			B2	355	1	4
19	O51	H10	A	nt	1
		H37	B1	297	1
20	O53	H4	F	117	2
21	O61	H51	B1	155	1
22	O69	H38	A	3107	1
23	O75	H42	A	8701	1
24	O78	H4	F	117	2
			F	117	2
		H12	C	88	2	6
25	O82	H21	B1	1800	1
26	O83	H42	F	1485	1
27	O88	H8	B1	101	3
		H10	B1	162	1
			B1	162	1
		H12	A	10	1	6
28	O89	H10	A	10	1
29	O100	H25	B1	683	1
		H32	A	10	1
30	O102	H23	B1	224	1
31	O114	H4	F	117	1
32	O115	H4	F	117	2
33	O117	H45	B1	616	1
34	O120	H4	B2	428	1
35	O154	H10	B1	533	1
36	O159	H20	A	2040	1
		H21	B1	641	1
37	O160	H4	F	117	1
38	O166	H15	D	349	1
		H25	A	10	1
39	O171	H4	F	117	1
40	O182	H7	B1	1148	1
	nt	H4	A	665	1
	nt	H14	A	1249	1
	nt	H28	B1	348	1
	nt	H34	F	354	1
	nt	H40	A	398	2
	nt	H48	A	10	1
	nt	H52	A	3941	1	8
				90
